# Supplementary material for: The expression of plakoglobin is a potential prognostic biomarker for patients with surgically resected lung adenocarcinoma
Source: PubMed Central journal article supplement (PMC4924786; doi:10.18632/oncotarget.7729), 2016-02-25
Supplement: oncotarget-07-15274-s001.pdf [file oncotarget-07-15274-s001.pdf]

**The expression of plakoglobin is a potential prognostic biomarker for patients with surgically resected lung adenocarcinoma**

**Supplementary Material**

**Supplementary Table 1:** The distribution of immunoreactivity score (IRS) for plakoglobin expression in all patients.

| immunoreactivity score | Case | Percentage |
|------------------------|------|------------|
| 0                      | 36   | 24.5       |
| 1                      | 7    | 4.8        |
| 2                      | 10   | 6.8        |
| 3                      | 6    | 4.1        |
| 4                      | 23   | 15.6       |
| 6                      | 12   | 8.2        |
| 8                      | 24   | 16.3       |
| 9                      | 5    | 3.4        |
| 12                     | 24   | 16.3       |
